# Supplementary material
Source: Springer Nature journal article supplement (https://www.springermedizin.de/resource/supplementary/12885_2010_2367_MOESM21_ESM.pdf/9461124)
Supplement: MOESM21 [file 9461124]

**Control**

**0.1 $\mu$ M dasatinib**

**0.1 $\mu$ M Eto**

**Dasatinib +  
etoposide**

**With DEAB**

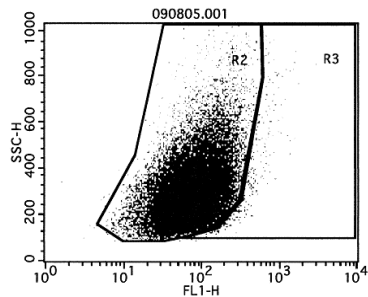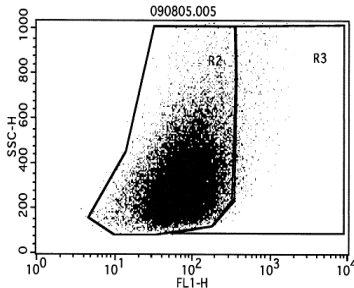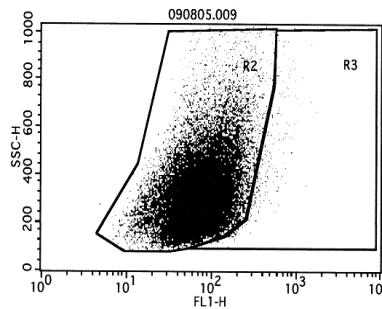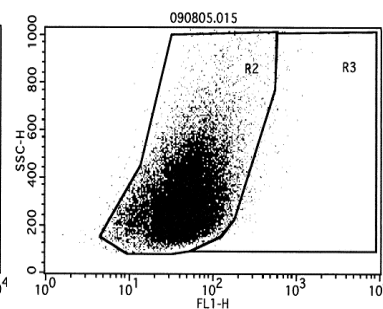

**Without DEAB**

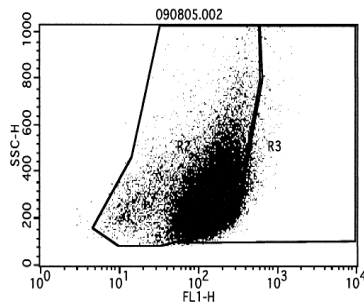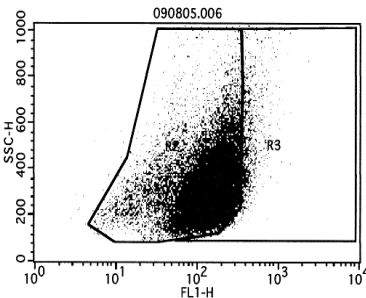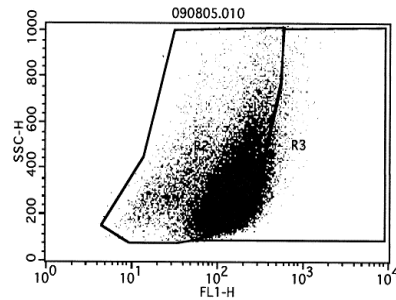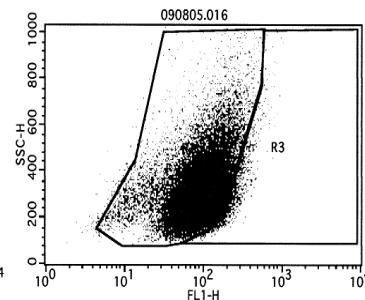

**The proportion of  
ALDH1-positive**

**5.25%**

**3.49%**

**7.81%**

**3.29%**
